# Supplementary material for: Transforming biomass conversion with ionic liquids: process intensification and the development of a high-gravity, one-pot process for the production of cellulosic ethanol
Source: Royal Society of Chemistry journal article supplement (doi:10.1039/c5ee02940f), 2015-12-24
Supplement: c5ee02940f1.pdf [file c5ee02940f1.pdf]

## SUPPORTING INFORMATION

### **Transforming biomass conversion with ionic liquids: process intensification and the development of a high-gravity, one-pot process for the production of cellulosic ethanol**

Feng Xu,<sup>ab</sup> Jian Sun,<sup>ab</sup> NVSN M. Konda,<sup>ac</sup> Jian Shi,<sup>ab</sup> Tanmoy Dutta,<sup>ab</sup> Corinne D. Scown,<sup>ad</sup> Blake A. Simmons,<sup>ab</sup> and Seema Singh<sup>ab\*</sup>

---

<sup>a</sup> Joint BioEnergy Institute, Lawrence Berkeley National Laboratory, Berkeley, CA, USA.

<sup>b</sup> Biological and Materials Sciences Center, Sandia National Laboratories, Livermore, CA, USA.

<sup>c</sup> Physical Biosciences Division, Lawrence Berkeley National Laboratory, Berkeley, CA, USA.

<sup>d</sup> Energy Analysis and Environmental Impacts Division, Lawrence Berkeley National Laboratory, Berkeley, CA, USA.

\*Corresponding author: E-mail: [seesing@sandia.gov](mailto:seesing@sandia.gov)

Table S1. Process and economic data for the three scenarios studied in the TEA

|                                                                                                                                                                                                                                                                                                                                                | Water-wash <sup>a</sup>                 | One-pot HG (current) <sup>b</sup> | One-pot HG (projected) <sup>c</sup> |
|------------------------------------------------------------------------------------------------------------------------------------------------------------------------------------------------------------------------------------------------------------------------------------------------------------------------------------------------|-----------------------------------------|-----------------------------------|-------------------------------------|
| Biomass processed (dry MT/day)                                                                                                                                                                                                                                                                                                                 | 2000                                    | 2000                              | 2000                                |
| Biomass price (\$/dry ton, delivered at plant-gate)                                                                                                                                                                                                                                                                                            | 80                                      | 80                                | 80                                  |
| Pretreatment                                                                                                                                                                                                                                                                                                                                   |                                         |                                   |                                     |
| IL used                                                                                                                                                                                                                                                                                                                                        | [C <sub>2</sub> C <sub>1</sub> Im][OAc] | [Ch][Lys]                         | [Ch][Lys]                           |
| IL purity (wt% of IL in aqueous IL solution [IL:H <sub>2</sub> O])                                                                                                                                                                                                                                                                             | 90                                      | 10                                | 10                                  |
| IL/Biomass ratio (mass ratio on dry basis)                                                                                                                                                                                                                                                                                                     | 3.6                                     | 0.29                              | 0.29                                |
| IL recovery (%)                                                                                                                                                                                                                                                                                                                                | 99.9                                    | 99.9                              | 99.9                                |
| IL price (\$/kg)                                                                                                                                                                                                                                                                                                                               | 5                                       | 5                                 | 2                                   |
| Water loading (mass ratio between water and biomass in water-wash step in WW route)                                                                                                                                                                                                                                                            | 20                                      | N/A                               | N/A                                 |
| Loss of glucan in water-wash step (wt% of initial glucan)                                                                                                                                                                                                                                                                                      | 5                                       | NONE                              | NONE                                |
| Loss of xylan in water-wash step (wt% of initial xylan)                                                                                                                                                                                                                                                                                        | 24                                      | NONE                              | NONE                                |
| Hydrolysis                                                                                                                                                                                                                                                                                                                                     |                                         |                                   |                                     |
| Enzyme loading (mg/g glucan present in initial biomass)                                                                                                                                                                                                                                                                                        | 20                                      | 20                                | 10                                  |
| Enzyme price (\$/kg protein)                                                                                                                                                                                                                                                                                                                   | 4.29                                    | 4.29                              | 4.29                                |
| Glucan-to-glucose conversion (%)                                                                                                                                                                                                                                                                                                               | 98                                      | 84                                | 90                                  |
| Xylan-to-xylose conversion (%)                                                                                                                                                                                                                                                                                                                 | 79                                      | 80                                | 90                                  |
| Fermentation                                                                                                                                                                                                                                                                                                                                   |                                         |                                   |                                     |
| Co-fermentation of glucose and xylose                                                                                                                                                                                                                                                                                                          | YES                                     | NO (only Glucose)                 | YES                                 |
| Glucose-to-ethanol conversion (%)                                                                                                                                                                                                                                                                                                              | 95                                      | 90                                | 90                                  |
| Xylose-to-ethanol conversion (%)                                                                                                                                                                                                                                                                                                               | 60                                      | 0                                 | 90                                  |
| <sup>a</sup> based on (Cruz et al. 2013, Li et al. 2013, Li et al. 2015, Shi et al. 2014, Uppugundla et al. 2014)<br><sup>b</sup> constructed to represent the 'current' one-pot HG process in this study<br><sup>c</sup> constructed to represent 'projected' one-pot HG process with perceived advances (esp. with yield and enzyme loading) |                                         |                                   |                                     |

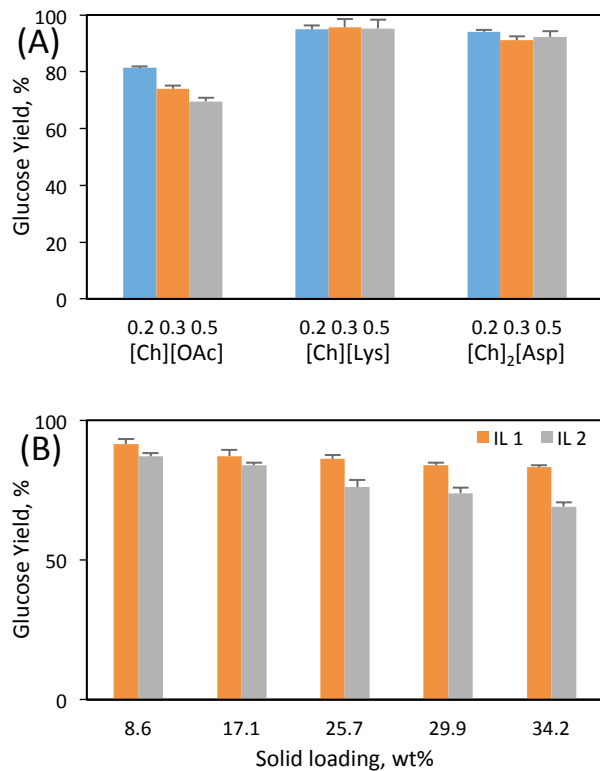

Figure S1. Glucose yields from saccharification of choline-based ionic liquid (IL1: [Ch][Lys]; IL 2: [Ch]<sub>2</sub>[Asp]) pretreated corn stover. (A) Glucose yields with different ratios (R: 0.2, 0.3, and 0.5) of biomass to ionic liquid loading in pretreatment; (B) Glucose yield after pretreatment with solid loading from 8.6 to 34.2 wt%.

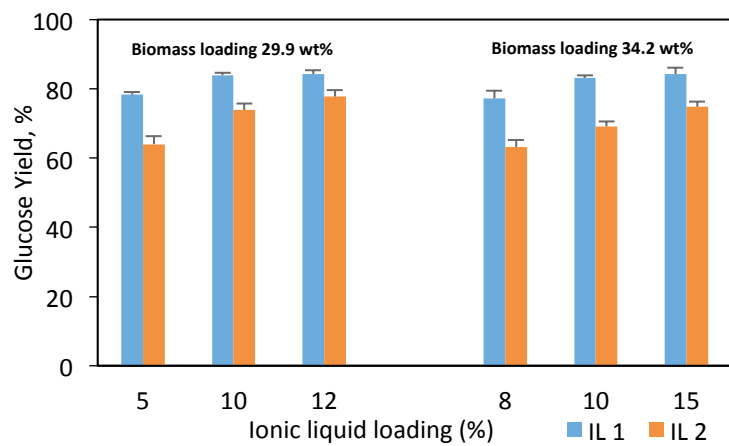

Figure S2. Glucose yields from saccharification of choline-based ionic liquids (IL1: [Ch][Lys]; IL 2: [Ch]<sub>2</sub>[Asp]) pretreated corn stover (mass loading of 29.9 wt% and 34.2 wt%) with different ionic liquid loading.

### Water-wash route process configuration

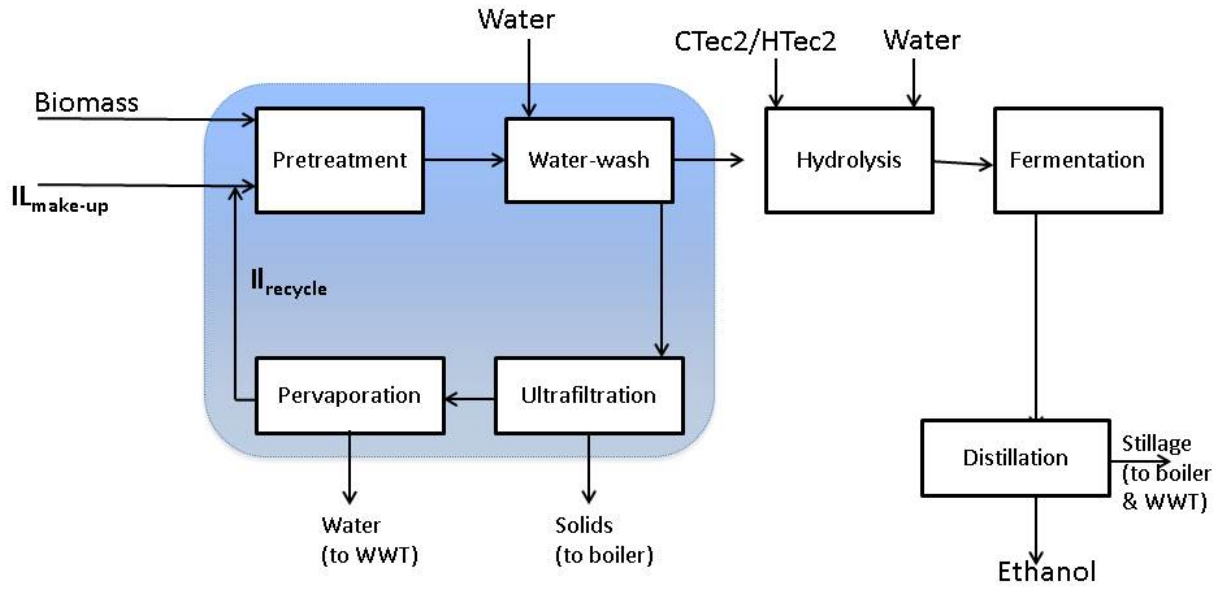

Figure S3. Simplified block flow diagram of water-wash process configuration

### One-pot HG process configuration with fed-batch hydrolysis

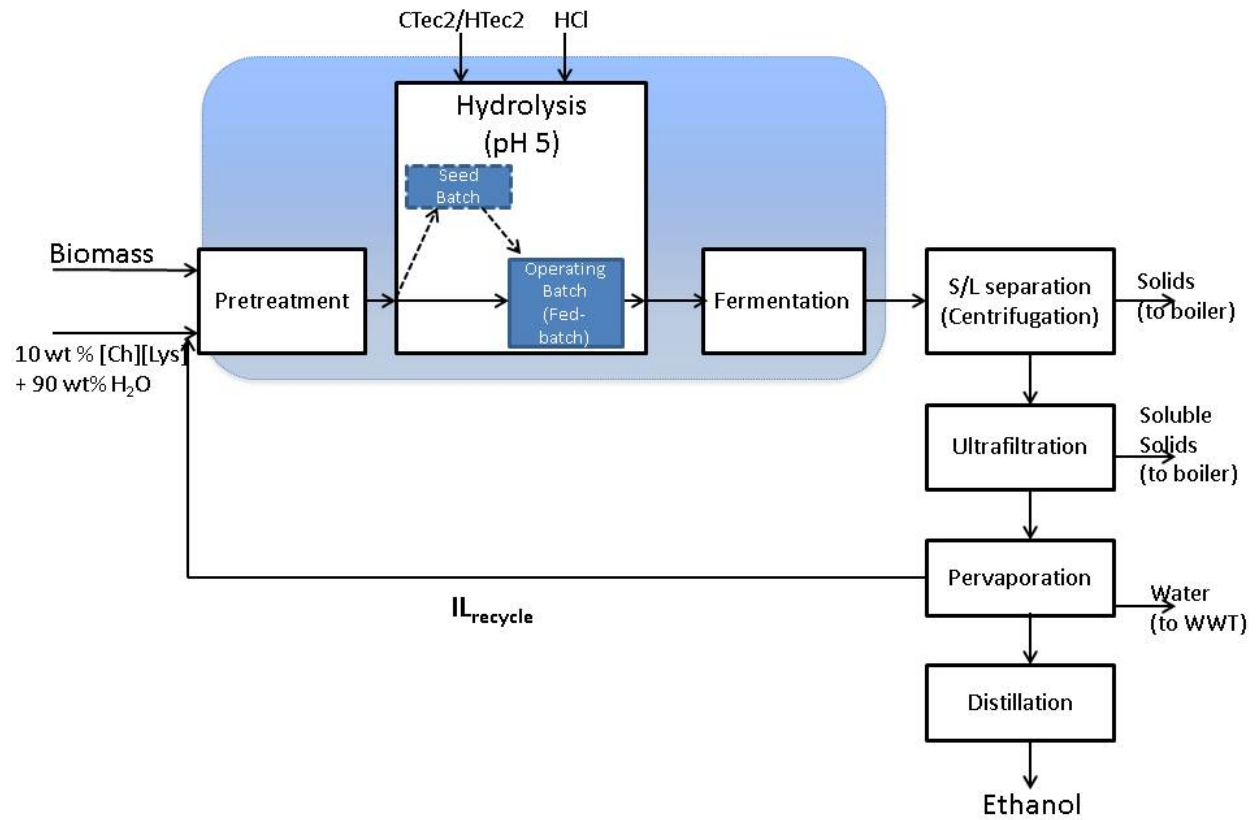

Figure S4. Simplified block flow diagram of one pot HG process configuration

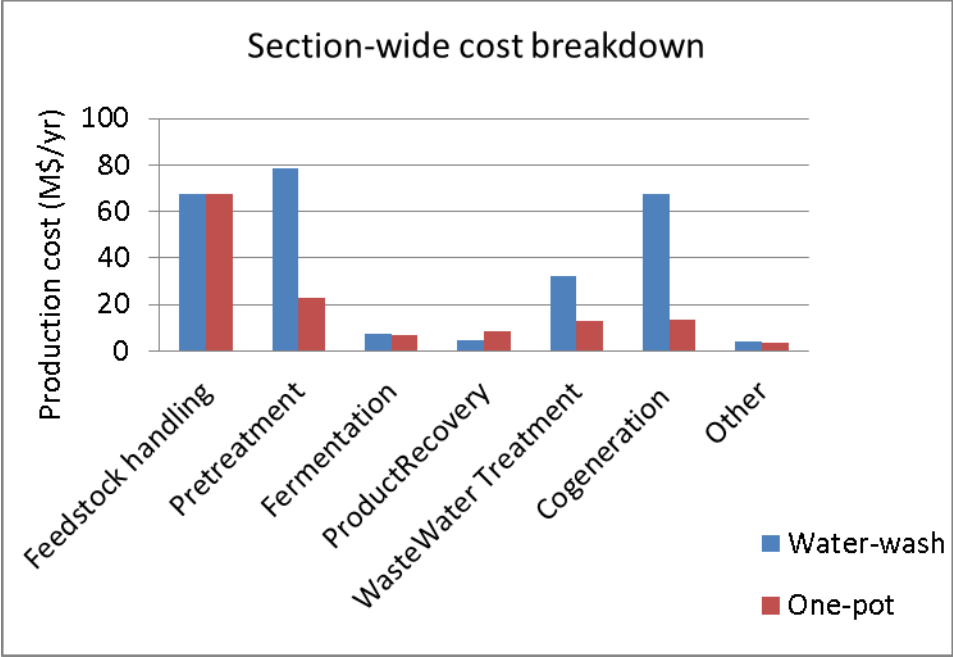

Figure S5. Section wide production costs (including CapEx and OpEx)

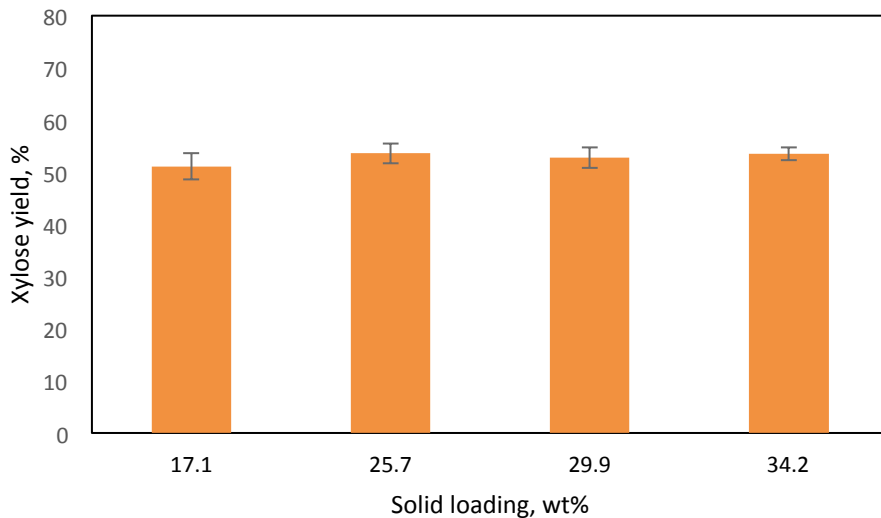

Figure S6. Xylose yields from [Ch][Lys] pretreated corn stover. The ionic liquid loading is 10%.

## References

- Cruz AG, Scullin C, Mu C, Cheng G, Stavila V, Varanasi P, Xu D, Mentel J, Chuang Y-D, Simmons BA. 2013. Impact of high biomass loading on ionic liquid pretreatment. *Biotechnology for biofuels* 6: 1-10.
- Li C, Tanjore D, He W, Wong J, Gardner JL, Sale KL, Simmons BA, Singh S. 2013. Scale-up and evaluation of high solid ionic liquid pretreatment and enzymatic hydrolysis of switchgrass. *Biotechnology for biofuels* 6: 1-14.
- Li C, Tanjore D, He W, Wong J, Gardner JL, Thompson VS, Yancey NA, Sale KL, Simmons BA, Singh S. 2015. Scale-Up of Ionic Liquid-Based Fractionation of Single and Mixed Feedstocks. *BioEnergy Research*: 1-10.
- Shi J, Balamurugan K, Parthasarathi R, Sathitsuksanoh N, Zhang S, Stavila V, Subramanian V, Simmons BA, Singh S. 2014. Understanding the role of water during ionic liquid pretreatment of lignocellulose: co-solvent or anti-solvent? *Green Chemistry* 16: 3830-3840.
- Uppugundla N, da Costa Sousa L, Chundawat SP, Yu X, Simmons B, Singh S, Gao X, Kumar R, Wyman CE, Dale BE. 2014. A comparative study of ethanol production using dilute acid, ionic liquid and AFEX™ pretreated corn stover. *Biotechnology for biofuels* 7: 72.
